# Supplementary material for: Consideration of sex and gender in Cochrane reviews of interventions for preventing healthcare-associated infections: a methodology study
Source: Springer Nature journal article supplement (doi:10.1186/s12913-019-4001-9), 2019-03-15
Supplement: MOESM7 [file 16552324]

Additional file 7: Sex and gender appraisal summary

|                           | 1.1. Are the terms sex and gender used in the title? | 1.2. Are the terms sex and gender used in the abstract? | 1.3. Does the abstract describe any subgroup differences by sex/gender? | 1.4. Are the terms sex, gender, male, or female used in abstract? | 1.5. Does the abstract describe any subgroup differences by sex/gender? | 1.6. Does the abstract describe any subgroup differences by sex/gender? | 1.7. Does the abstract describe any subgroup differences by sex/gender? | 1.8. Does the abstract describe any subgroup differences by sex/gender? | 1.9. Does the abstract describe any subgroup differences by sex/gender? | 1.10. Does the abstract describe any subgroup differences by sex/gender? | 1.11. Does the abstract describe any subgroup differences by sex/gender? | 1.12. Does the abstract describe any subgroup differences by sex/gender? | 1.13. Does the abstract describe any subgroup differences by sex/gender? | 1.14. Does the abstract describe any subgroup differences by sex/gender? | 1.15. Does the abstract describe any subgroup differences by sex/gender? | 1.16. Does the abstract describe any subgroup differences by sex/gender? | 1.17. Does the abstract describe any subgroup differences by sex/gender? | 1.18. Does the abstract describe any subgroup differences by sex/gender? | 1.19. Does the abstract describe any subgroup differences by sex/gender? | 1.20. Does the abstract describe any subgroup differences by sex/gender? | 1.21. Does the abstract describe any subgroup differences by sex/gender? |  |
|---------------------------|------------------------------------------------------|---------------------------------------------------------|-------------------------------------------------------------------------|-------------------------------------------------------------------|-------------------------------------------------------------------------|-------------------------------------------------------------------------|-------------------------------------------------------------------------|-------------------------------------------------------------------------|-------------------------------------------------------------------------|--------------------------------------------------------------------------|--------------------------------------------------------------------------|--------------------------------------------------------------------------|--------------------------------------------------------------------------|--------------------------------------------------------------------------|--------------------------------------------------------------------------|--------------------------------------------------------------------------|--------------------------------------------------------------------------|--------------------------------------------------------------------------|--------------------------------------------------------------------------|--------------------------------------------------------------------------|--------------------------------------------------------------------------|--|
| Akhtewaji 2015            |                                                      |                                                         |                                                                         |                                                                   |                                                                         |                                                                         |                                                                         |                                                                         |                                                                         |                                                                          |                                                                          |                                                                          |                                                                          |                                                                          |                                                                          |                                                                          |                                                                          |                                                                          |                                                                          |                                                                          |                                                                          |  |
| Anderson 2005             |                                                      |                                                         |                                                                         |                                                                   |                                                                         |                                                                         |                                                                         |                                                                         |                                                                         |                                                                          |                                                                          |                                                                          |                                                                          |                                                                          |                                                                          |                                                                          |                                                                          |                                                                          |                                                                          |                                                                          |                                                                          |  |
| Amaki 2005                |                                                      |                                                         |                                                                         |                                                                   |                                                                         |                                                                         |                                                                         |                                                                         |                                                                         |                                                                          |                                                                          |                                                                          |                                                                          |                                                                          |                                                                          |                                                                          |                                                                          |                                                                          |                                                                          |                                                                          |                                                                          |  |
| Anra 2010                 |                                                      |                                                         |                                                                         |                                                                   |                                                                         |                                                                         |                                                                         |                                                                         |                                                                         |                                                                          |                                                                          |                                                                          |                                                                          |                                                                          |                                                                          |                                                                          |                                                                          |                                                                          |                                                                          |                                                                          |                                                                          |  |
| Amosweb 2014              |                                                      |                                                         |                                                                         |                                                                   |                                                                         |                                                                         |                                                                         |                                                                         |                                                                         |                                                                          |                                                                          |                                                                          |                                                                          |                                                                          |                                                                          |                                                                          |                                                                          |                                                                          |                                                                          |                                                                          |                                                                          |  |
| Bangas-Nana 2013          |                                                      |                                                         |                                                                         |                                                                   |                                                                         |                                                                         |                                                                         |                                                                         |                                                                         |                                                                          |                                                                          |                                                                          |                                                                          |                                                                          |                                                                          |                                                                          |                                                                          |                                                                          |                                                                          |                                                                          |                                                                          |  |
| Bu 2014                   |                                                      |                                                         |                                                                         |                                                                   |                                                                         |                                                                         |                                                                         |                                                                         |                                                                         |                                                                          |                                                                          |                                                                          |                                                                          |                                                                          |                                                                          |                                                                          |                                                                          |                                                                          |                                                                          |                                                                          |                                                                          |  |
| Bradford 2015             |                                                      |                                                         |                                                                         |                                                                   |                                                                         |                                                                         |                                                                         |                                                                         |                                                                         |                                                                          |                                                                          |                                                                          |                                                                          |                                                                          |                                                                          |                                                                          |                                                                          |                                                                          |                                                                          |                                                                          |                                                                          |  |
| Brand 2010                |                                                      |                                                         |                                                                         |                                                                   |                                                                         |                                                                         |                                                                         |                                                                         |                                                                         |                                                                          |                                                                          |                                                                          |                                                                          |                                                                          |                                                                          |                                                                          |                                                                          |                                                                          |                                                                          |                                                                          |                                                                          |  |
| Brand 2013                |                                                      |                                                         |                                                                         |                                                                   |                                                                         |                                                                         |                                                                         |                                                                         |                                                                         |                                                                          |                                                                          |                                                                          |                                                                          |                                                                          |                                                                          |                                                                          |                                                                          |                                                                          |                                                                          |                                                                          |                                                                          |  |
| Brand 2015                |                                                      |                                                         |                                                                         |                                                                   |                                                                         |                                                                         |                                                                         |                                                                         |                                                                         |                                                                          |                                                                          |                                                                          |                                                                          |                                                                          |                                                                          |                                                                          |                                                                          |                                                                          |                                                                          |                                                                          |                                                                          |  |
| Brand 2016                |                                                      |                                                         |                                                                         |                                                                   |                                                                         |                                                                         |                                                                         |                                                                         |                                                                         |                                                                          |                                                                          |                                                                          |                                                                          |                                                                          |                                                                          |                                                                          |                                                                          |                                                                          |                                                                          |                                                                          |                                                                          |  |
| Brigandakis-Peterson 2015 |                                                      |                                                         |                                                                         |                                                                   |                                                                         |                                                                         |                                                                         |                                                                         |                                                                         |                                                                          |                                                                          |                                                                          |                                                                          |                                                                          |                                                                          |                                                                          |                                                                          |                                                                          |                                                                          |                                                                          |                                                                          |  |
| Cooper 2016               |                                                      |                                                         |                                                                         |                                                                   |                                                                         |                                                                         |                                                                         |                                                                         |                                                                         |                                                                          |                                                                          |                                                                          |                                                                          |                                                                          |                                                                          |                                                                          |                                                                          |                                                                          |                                                                          |                                                                          |                                                                          |  |
| D'Amico 2009              |                                                      |                                                         |                                                                         |                                                                   |                                                                         |                                                                         |                                                                         |                                                                         |                                                                         |                                                                          |                                                                          |                                                                          |                                                                          |                                                                          |                                                                          |                                                                          |                                                                          |                                                                          |                                                                          |                                                                          |                                                                          |  |
| Dziewicki 2012            |                                                      |                                                         |                                                                         |                                                                   |                                                                         |                                                                         |                                                                         |                                                                         |                                                                         |                                                                          |                                                                          |                                                                          |                                                                          |                                                                          |                                                                          |                                                                          |                                                                          |                                                                          |                                                                          |                                                                          |                                                                          |  |
| Dumitru 2015              |                                                      |                                                         |                                                                         |                                                                   |                                                                         |                                                                         |                                                                         |                                                                         |                                                                         |                                                                          |                                                                          |                                                                          |                                                                          |                                                                          |                                                                          |                                                                          |                                                                          |                                                                          |                                                                          |                                                                          |                                                                          |  |
| Dumitru 2016              |                                                      |                                                         |                                                                         |                                                                   |                                                                         |                                                                         |                                                                         |                                                                         |                                                                         |                                                                          |                                                                          |                                                                          |                                                                          |                                                                          |                                                                          |                                                                          |                                                                          |                                                                          |                                                                          |                                                                          |                                                                          |  |
| Epano-Nwadiro 2015        |                                                      |                                                         |                                                                         |                                                                   |                                                                         |                                                                         |                                                                         |                                                                         |                                                                         |                                                                          |                                                                          |                                                                          |                                                                          |                                                                          |                                                                          |                                                                          |                                                                          |                                                                          |                                                                          |                                                                          |                                                                          |  |
| Fernandez 2012            |                                                      |                                                         |                                                                         |                                                                   |                                                                         |                                                                         |                                                                         |                                                                         |                                                                         |                                                                          |                                                                          |                                                                          |                                                                          |                                                                          |                                                                          |                                                                          |                                                                          |                                                                          |                                                                          |                                                                          |                                                                          |  |
| Fidgen 2013               |                                                      |                                                         |                                                                         |                                                                   |                                                                         |                                                                         |                                                                         |                                                                         |                                                                         |                                                                          |                                                                          |                                                                          |                                                                          |                                                                          |                                                                          |                                                                          |                                                                          |                                                                          |                                                                          |                                                                          |                                                                          |  |
| Fidgen 2016               |                                                      |                                                         |                                                                         |                                                                   |                                                                         |                                                                         |                                                                         |                                                                         |                                                                         |                                                                          |                                                                          |                                                                          |                                                                          |                                                                          |                                                                          |                                                                          |                                                                          |                                                                          |                                                                          |                                                                          |                                                                          |  |
| Foon 2012                 |                                                      |                                                         |                                                                         |                                                                   |                                                                         |                                                                         |                                                                         |                                                                         |                                                                         |                                                                          |                                                                          |                                                                          |                                                                          |                                                                          |                                                                          |                                                                          |                                                                          |                                                                          |                                                                          |                                                                          |                                                                          |  |
| Gawn 2016                 |                                                      |                                                         |                                                                         |                                                                   |                                                                         |                                                                         |                                                                         |                                                                         |                                                                         |                                                                          |                                                                          |                                                                          |                                                                          |                                                                          |                                                                          |                                                                          |                                                                          |                                                                          |                                                                          |                                                                          |                                                                          |  |
| Ge 2012                   |                                                      |                                                         |                                                                         |                                                                   |                                                                         |                                                                         |                                                                         |                                                                         |                                                                         |                                                                          |                                                                          |                                                                          |                                                                          |                                                                          |                                                                          |                                                                          |                                                                          |                                                                          |                                                                          |                                                                          |                                                                          |  |
| Gleason 2010              |                                                      |                                                         |                                                                         |                                                                   |                                                                         |                                                                         |                                                                         |                                                                         |                                                                         |                                                                          |                                                                          |                                                                          |                                                                          |                                                                          |                                                                          |                                                                          |                                                                          |                                                                          |                                                                          |                                                                          |                                                                          |  |
| Gleason 2013              |                                                      |                                                         |                                                                         |                                                                   |                                                                         |                                                                         |                                                                         |                                                                         |                                                                         |                                                                          |                                                                          |                                                                          |                                                                          |                                                                          |                                                                          |                                                                          |                                                                          |                                                                          |                                                                          |                                                                          |                                                                          |  |
| Gossard 2004              |                                                      |                                                         |                                                                         |                                                                   |                                                                         |                                                                         |                                                                         |                                                                         |                                                                         |                                                                          |                                                                          |                                                                          |                                                                          |                                                                          |                                                                          |                                                                          |                                                                          |                                                                          |                                                                          |                                                                          |                                                                          |  |
| Gouli 2010                |                                                      |                                                         |                                                                         |                                                                   |                                                                         |                                                                         |                                                                         |                                                                         |                                                                         |                                                                          |                                                                          |                                                                          |                                                                          |                                                                          |                                                                          |                                                                          |                                                                          |                                                                          |                                                                          |                                                                          |                                                                          |  |
| Guthrie 2007              |                                                      |                                                         |                                                                         |                                                                   |                                                                         |                                                                         |                                                                         |                                                                         |                                                                         |                                                                          |                                                                          |                                                                          |                                                                          |                                                                          |                                                                          |                                                                          |                                                                          |                                                                          |                                                                          |                                                                          |                                                                          |  |
| Gurwamy 2011              |                                                      |                                                         |                                                                         |                                                                   |                                                                         |                                                                         |                                                                         |                                                                         |                                                                         |                                                                          |                                                                          |                                                                          |                                                                          |                                                                          |                                                                          |                                                                          |                                                                          |                                                                          |                                                                          |                                                                          |                                                                          |  |
| Gurwamy 2013a             |                                                      |                                                         |                                                                         |                                                                   |                                                                         |                                                                         |                                                                         |                                                                         |                                                                         |                                                                          |                                                                          |                                                                          |                                                                          |                                                                          |                                                                          |                                                                          |                                                                          |                                                                          |                                                                          |                                                                          |                                                                          |  |
| Gurwamy 2013b             |                                                      |                                                         |                                                                         |                                                                   |                                                                         |                                                                         |                                                                         |                                                                         |                                                                         |                                                                          |                                                                          |                                                                          |                                                                          |                                                                          |                                                                          |                                                                          |                                                                          |                                                                          |                                                                          |                                                                          |                                                                          |  |
| Gye 2014                  |                                                      |                                                         |                                                                         |                                                                   |                                                                         |                                                                         |                                                                         |                                                                         |                                                                         |                                                                          |                                                                          |                                                                          |                                                                          |                                                                          |                                                                          |                                                                          |                                                                          |                                                                          |                                                                          |                                                                          |                                                                          |  |
| Haas 2014                 |                                                      |                                                         |                                                                         |                                                                   |                                                                         |                                                                         |                                                                         |                                                                         |                                                                         |                                                                          |                                                                          |                                                                          |                                                                          |                                                                          |                                                                          |                                                                          |                                                                          |                                                                          |                                                                          |                                                                          |                                                                          |  |
| Hedlat 2014               |                                                      |                                                         |                                                                         |                                                                   |                                                                         |                                                                         |                                                                         |                                                                         |                                                                         |                                                                          |                                                                          |                                                                          |                                                                          |                                                                          |                                                                          |                                                                          |                                                                          |                                                                          |                                                                          |                                                                          |                                                                          |  |
| Heal 2016                 |                                                      |                                                         |                                                                         |                                                                   |                                                                         |                                                                         |                                                                         |                                                                         |                                                                         |                                                                          |                                                                          |                                                                          |                                                                          |                                                                          |                                                                          |                                                                          |                                                                          |                                                                          |                                                                          |                                                                          |                                                                          |  |
| Hsu 2016                  |                                                      |                                                         |                                                                         |                                                                   |                                                                         |                                                                         |                                                                         |                                                                         |                                                                         |                                                                          |                                                                          |                                                                          |                                                                          |                                                                          |                                                                          |                                                                          |                                                                          |                                                                          |                                                                          |                                                                          |                                                                          |  |
| Hua 2016                  |                                                      |                                                         |                                                                         |                                                                   |                                                                         |                                                                         |                                                                         |                                                                         |                                                                         |                                                                          |                                                                          |                                                                          |                                                                          |                                                                          |                                                                          |                                                                          |                                                                          |                                                                          |                                                                          |                                                                          |                                                                          |  |
| Hughes 2013               |                                                      |                                                         |                                                                         |                                                                   |                                                                         |                                                                         |                                                                         |                                                                         |                                                                         |                                                                          |                                                                          |                                                                          |                                                                          |                                                                          |                                                                          |                                                                          |                                                                          |                                                                          |                                                                          |                                                                          |                                                                          |  |
| Inelard 2014              |                                                      |                                                         |                                                                         |                                                                   |                                                                         |                                                                         |                                                                         |                                                                         |                                                                         |                                                                          |                                                                          |                                                                          |                                                                          |                                                                          |                                                                          |                                                                          |                                                                          |                                                                          |                                                                          |                                                                          |                                                                          |  |
| Jarman 2013               |                                                      |                                                         |                                                                         |                                                                   |                                                                         |                                                                         |                                                                         |                                                                         |                                                                         |                                                                          |                                                                          |                                                                          |                                                                          |                                                                          |                                                                          |                                                                          |                                                                          |                                                                          |                                                                          |                                                                          |                                                                          |  |
| Jefferson 2013            |                                                      |                                                         |                                                                         |                                                                   |                                                                         |                                                                         |                                                                         |                                                                         |                                                                         |                                                                          |                                                                          |                                                                          |                                                                          |                                                                          |                                                                          |                                                                          |                                                                          |                                                                          |                                                                          |                                                                          |                                                                          |  |
| Janus 2014                |                                                      |                                                         |                                                                         |                                                                   |                                                                         |                                                                         |                                                                         |                                                                         |                                                                         |                                                                          |                                                                          |                                                                          |                                                                          |                                                                          |                                                                          |                                                                          |                                                                          |                                                                          |                                                                          |                                                                          |                                                                          |  |
| Kao 2009                  |                                                      |                                                         |                                                                         |                                                                   |                                                                         |                                                                         |                                                                         |                                                                         |                                                                         |                                                                          |                                                                          |                                                                          |                                                                          |                                                                          |                                                                          |                                                                          |                                                                          |                                                                          |                                                                          |                                                                          |                                                                          |  |
| Kelly 2010                |                                                      |                                                         |                                                                         |                                                                   |                                                                         |                                                                         |                                                                         |                                                                         |                                                                         |                                                                          |                                                                          |                                                                          |                                                                          |                                                                          |                                                                          |                                                                          |                                                                          |                                                                          |                                                                          |                                                                          |                                                                          |  |
| Khal 2015                 |                                                      |                                                         |                                                                         |                                                                   |                                                                         |                                                                         |                                                                         |                                                                         |                                                                         |                                                                          |                                                                          |                                                                          |                                                                          |                                                                          |                                                                          |                                                                          |                                                                          |                                                                          |                                                                          |                                                                          |                                                                          |  |
| Lai 2016a                 |                                                      |                                                         |                                                                         |                                                                   |                                                                         |                                                                         |                                                                         |                                                                         |                                                                         |                                                                          |                                                                          |                                                                          |                                                                          |                                                                          |                                                                          |                                                                          |                                                                          |                                                                          |                                                                          |                                                                          |                                                                          |  |
| Lai 2016b                 |                                                      |                                                         |                                                                         |                                                                   |                                                                         |                                                                         |                                                                         |                                                                         |                                                                         |                                                                          |                                                                          |                                                                          |                                                                          |                                                                          |                                                                          |                                                                          |                                                                          |                                                                          |                                                                          |                                                                          |                                                                          |  |
| Lam 2014                  |                                                      |                                                         |                                                                         |                                                                   |                                                                         |                                                                         |                                                                         |                                                                         |                                                                         |                                                                          |                                                                          |                                                                          |                                                                          |                                                                          |                                                                          |                                                                          |                                                                          |                                                                          |                                                                          |                                                                          |                                                                          |  |
| Lefebvre 2013             |                                                      |                                                         |                                                                         |                                                                   |                                                                         |                                                                         |                                                                         |                                                                         |                                                                         |                                                                          |                                                                          |                                                                          |                                                                          |                                                                          |                                                                          |                                                                          |                                                                          |                                                                          |                                                                          |                                                                          |                                                                          |  |
| Lobovotoku 2014           |                                                      |                                                         |                                                                         |                                                                   |                                                                         |                                                                         |                                                                         |                                                                         |                                                                         |                                                                          |                                                                          |                                                                          |                                                                          |                                                                          |                                                                          |                                                                          |                                                                          |                                                                          |                                                                          |                                                                          |                                                                          |  |
| Loe 2013                  |                                                      |                                                         |                                                                         |                                                                   |                                                                         |                                                                         |                                                                         |                                                                         |                                                                         |                                                                          |                                                                          |                                                                          |                                                                          |                                                                          |                                                                          |                                                                          |                                                                          |                                                                          |                                                                          |                                                                          |                                                                          |  |
| Lu 2016                   |                                                      |                                                         |                                                                         |                                                                   |                                                                         |                                                                         |                                                                         |                                                                         |                                                                         |                                                                          |                                                                          |                                                                          |                                                                          |                                                                          |                                                                          |                                                                          |                                                                          |                                                                          |                                                                          |                                                                          |                                                                          |  |
| Loe 2012                  |                                                      |                                                         |                                                                         |                                                                   |                                                                         |                                                                         |                                                                         |                                                                         |                                                                         |                                                                          |                                                                          |                                                                          |                                                                          |                                                                          |                                                                          |                                                                          |                                                                          |                                                                          |                                                                          |                                                                          |                                                                          |  |
| Loeb 2003                 |                                                      |                                                         |                                                                         |                                                                   |                                                                         |                                                                         |                                                                         |                                                                         |                                                                         |                                                                          |                                                                          |                                                                          |                                                                          |                                                                          |                                                                          |                                                                          |                                                                          |                                                                          |                                                                          |                                                                          |                                                                          |  |
| López-Alcalá 2015         |                                                      |                                                         |                                                                         |                                                                   |                                                                         |                                                                         |                                                                         |                                                                         |                                                                         |                                                                          |                                                                          |                                                                          |                                                                          |                                                                          |                                                                          |                                                                          |                                                                          |                                                                          |                                                                          |                                                                          |                                                                          |  |
| Lopez-Briz 2014           |                                                      |                                                         |                                                                         |                                                                   |                                                                         |                                                                         |                                                                         |                                                                         |                                                                         |                                                                          |                                                                          |                                                                          |                                                                          |                                                                          |                                                                          |                                                                          |                                                                          |                                                                          |                                                                          |                                                                          |                                                                          |  |
| Lee 2012                  |                                                      |                                                         |                                                                         |                                                                   |                                                                         |                                                                         |                                                                         |                                                                         |                                                                         |                                                                          |                                                                          |                                                                          |                                                                          |                                                                          |                                                                          |                                                                          |                                                                          |                                                                          |                                                                          |                                                                          |                                                                          |  |
| Loeb 2013                 |                                                      |                                                         |                                                                         |                                                                   |                                                                         |                                                                         |                                                                         |                                                                         |                                                                         |                                                                          |                                                                          |                                                                          |                                                                          |                                                                          |                                                                          |                                                                          |                                                                          |                                                                          |                                                                          |                                                                          |                                                                          |  |
| Mackinnon 2014            |                                                      |                                                         |                                                                         |                                                                   |                                                                         |                                                                         |                                                                         |                                                                         |                                                                         |                                                                          |                                                                          |                                                                          |                                                                          |                                                                          |                                                                          |                                                                          |                                                                          |                                                                          |                                                                          |                                                                          |                                                                          |  |
| Machii 2016               |                                                      |                                                         |                                                                         |                                                                   |                                                                         |                                                                         |                                                                         |                                                                         |                                                                         |                                                                          |                                                                          |                                                                          |                                                                          |                                                                          |                                                                          |                                                                          |                                                                          |                                                                          |                                                                          |                                                                          |                                                                          |  |
| Maki 2015                 |                                                      |                                                         |                                                                         |                                                                   |                                                                         |                                                                         |                                                                         |                                                                         |                                                                         |                                                                          |                                                                          |                                                                          |                                                                          |                                                                          |                                                                          |                                                                          |                                                                          |                                                                          |                                                                          |                                                                          |                                                                          |  |
| Mastora 2012              |                                                      |                                                         |                                                                         |                                                                   |                                                                         |                                                                         |                                                                         |                                                                         |                                                                         |                                                                          |                                                                          |                                                                          |                                                                          |                                                                          |                                                                          |                                                                          |                                                                          |                                                                          |                                                                          |                                                                          |                                                                          |  |
| May 2007                  |                                                      |                                                         |                                                                         |                                                                   |                                                                         |                                                                         |                                                                         |                                                                         |                                                                         |                                                                          |                                                                          |                                                                          |                                                                          |                                                                          |                                                                          |                                                                          |                                                                          |                                                                          |                                                                          |                                                                          |                                                                          |  |
| McCann 2010               |                                                      |                                                         |                                                                         |                                                                   |                                                                         |                                                                         |                                                                         |                                                                         |                                                                         |                                                                          |                                                                          |                                                                          |                                                                          |                                                                          |                                                                          |                                                                          |                                                                          |                                                                          |                                                                          |                                                                          |                                                                          |  |
| Nahari 2016               |                                                      |                                                         |                                                                         |                                                                   |                                                                         |                                                                         |                                                                         |                                                                         |                                                                         |                                                                          |                                                                          |                                                                          |                                                                          |                                                                          |                                                                          |                                                                          |                                                                          |                                                                          |                                                                          |                                                                          |                                                                          |  |
| Nelson 2014               |                                                      |                                                         |                                                                         |                                                                   |                                                                         |                                                                         |                                                                         |                                                                         |                                                                         |                                                                          |                                                                          |                                                                          |                                                                          |                                                                          |                                                                          |                                                                          |                                                                          |                                                                          |                                                                          |                                                                          |                                                                          |  |
| Nel-Veske 2012            |                                                      |                                                         |                                                                         |                                                                   |                                                                         |                                                                         |                                                                         |                                                                         |                                                                         |                                                                          |                                                                          |                                                                          |                                                                          |                                                                          |                                                                          |                                                                          |                                                                          |                                                                          |                                                                          |                                                                          |                                                                          |  |
| Norman 2016a              |                                                      |                                                         |                                                                         |                                                                   |                                                                         |                                                                         |                                                                         |                                                                         |                                                                         |                                                                          |                                                                          |                                                                          |                                                                          |                                                                          |                                                                          |                                                                          |                                                                          |                                                                          |                                                                          |                                                                          |                                                                          |  |
| Norman 2016b              |                                                      |                                                         |                                                                         |                                                                   |                                                                         |                                                                         |                                                                         |                                                                         |                                                                         |                                                                          |                                                                          |                                                                          |                                                                          |                                                                          |                                                                          |                                                                          |                                                                          |                                                                          |                                                                          |                                                                          |                                                                          |  |
| Phips 2006                |                                                      |                                                         |                                                                         |                                                                   |                                                                         |                                                                         |                                                                         |                                                                         |                                                                         |                                                                          |                                                                          |                                                                          |                                                                          |                                                                          |                                                                          |                                                                          |                                                                          |                                                                          |                                                                          |                                                                          |                                                                          |  |
| Phua 2010                 |                                                      |                                                         |                                                                         |                                                                   |                                                                         |                                                                         |                                                                         |                                                                         |                                                                         |                                                                          |                                                                          |                                                                          |                                                                          |                                                                          |                                                                          |                                                                          |                                                                          |                                                                          |                                                                          |                                                                          |                                                                          |  |
| Rutak 2006                |                                                      |                                                         |                                                                         |                                                                   |                                                                         |                                                                         |                                                                         |                                                                         |                                                                         |                                                                          |                                                                          |                                                                          |                                                                          |                                                                          |                                                                          |                                                                          |                                                                          |                                                                          |                                                                          |                                                                          |                                                                          |  |
| Ray 2014                  |                                                      |                                                         |                                                                         |                                                                   |                                                                         |                                                                         |                                                                         |                                                                         |                                                                         |                                                                          |                                                                          |                                                                          |                                                                          |                                                                          |                                                                          |                                                                          |                                                                          |                                                                          |                                                                          |                                                                          |                                                                          |  |
| Roberson-Mat 2014         |                                                      |                                                         |                                                                         |                                                                   |                                                                         |                                                                         |                                                                         |                                                                         |                                                                         |                                                                          |                                                                          |                                                                          |                                                                          |                                                                          |                                                                          |                                                                          |                                                                          |                                                                          |                                                                          |                                                                          |                                                                          |  |
| Saiki 2014                |                                                      |                                                         |                                                                         |                                                                   |                                                                         |                                                                         |                                                                         |                                                                         |                                                                         |                                                                          |                                                                          |                                                                          |                                                                          |                                                                          |                                                                          |                                                                          |                                                                          |                                                                          |                                                                          |                                                                          |                                                                          |  |
| Santoro 2016              |                                                      |                                                         |                                                                         |                                                                   |                                                                         |                                                                         |                                                                         |                                                                         |                                                                         |                                                                          |                                                                          |                                                                          |                                                                          |                                                                          |                                                                          |                                                                          |                                                                          |                                                                          |                                                                          |                                                                          |                                                                          |  |
| Sanchez-Mansel 2012       |                                                      |                                                         |                                                                         |                                                                   |                                                                         |                                                                         |                                                                         |                                                                         |                                                                         |                                                                          |                                                                          |                                                                          |                                                                          |                                                                          |                                                                          |                                                                          |                                                                          |                                                                          |                                                                          |                                                                          |                                                                          |  |
| Shah 2014                 |                                                      |                                                         |                                                                         |                                                                   |                                                                         |                                                                         |                                                                         |                                                                         |                                                                         |                                                                          |                                                                          |                                                                          |                                                                          |                                                                          |                                                                          |                                                                          |                                                                          |                                                                          |                                                                          |                                                                          |                                                                          |  |
| Small 2014                |                                                      |                                                         |                                                                         |                                                                   |                                                                         |                                                                         |                                                                         |                                                                         |                                                                         |                                                                          |                                                                          |                                                                          |                                                                          |                                                                          |                                                                          |                                                                          |                                                                          |                                                                          |                                                                          |                                                                          |                                                                          |  |
| Stewart 2009              |                                                      |                                                         |                                                                         |                                                                   |                                                                         |                                                                         |                                                                         |                                                                         |                                                                         |                                                                          |                                                                          |                                                                          |                                                                          |                                                                          |                                                                          |                                                                          |                                                                          |                                                                          |                                                                          |                                                                          |                                                                          |  |
| Strom-Verkerk 2010        |                                                      |                                                         |                                                                         |                                                                   |                                                                         |                                                                         |                                                                         |                                                                         |                                                                         |                                                                          |                                                                          |                                                                          |                                                                          |                                                                          |                                                                          |                                                                          |                                                                          |                                                                          |                                                                          |                                                                          |                                                                          |  |
| Strippel 2004a            |                                                      |                                                         |                                                                         |                                                                   |                                                                         |                                                                         |                                                                         |                                                                         |                                                                         |                                                                          |                                                                          |                                                                          |                                                                          |                                                                          |                                                                          |                                                                          |                                                                          |                                                                          |                                                                          |                                                                          |                                                                          |  |
| Strippel 2006             |                                                      |                                                         |                                                                         |                                                                   |                                                                         |                                                                         |                                                                         |                                                                         |                                                                         |                                                                          |                                                                          |                                                                          |                                                                          |                                                                          |                                                                          |                                                                          |                                                                          |                                                                          |                                                                          |                                                                          |                                                                          |  |
| Subramo 2007              |                                                      |                                                         |                                                                         |                                                                   |                                                                         |                                                                         |                                                                         |                                                                         |                                                                         |                                                                          |                                                                          |                                                                          |                                                                          |                                                                          |                                                                          |                                                                          |                                                                          |                                                                          |                                                                          |                                                                          |                                                                          |  |
| Syed 2013                 |                                                      |                                                         |                                                                         |                                                                   |                                                                         |                                                                         |                                                                         |                                                                         |                                                                         |                                                                          |                                                                          |                                                                          |                                                                          |                                                                          |                                                                          |                                                                          |                                                                          |                                                                          |                                                                          |                                                                          |                                                                          |  |
| Terrier 2008              |                                                      |                                                         |                                                                         |                                                                   |                                                                         |                                                                         |                                                                         |                                                                         |                                                                         |                                                                          |                                                                          |                                                                          |                                                                          |                                                                          |                                                                          |                                                                          |                                                                          |                                                                          |                                                                          |                                                                          |                                                                          |  |
| Terrier 2011              |                                                      |                                                         |                                                                         |                                                                   |                                                                         |                                                                         |                                                                         |                                                                         |                                                                         |                                                                          |                                                                          |                                                                          |                                                                          |                                                                          |                                                                          |                                                                          |                                                                          |                                                                          |                                                                          |                                                                          |                                                                          |  |
| Terrier 2016              |                                                      |                                                         |                                                                         |                                                                   |                                                                         |                                                                         |                                                                         |                                                                         |                                                                         |                                                                          |                                                                          |                                                                          |                                                                          |                                                                          |                                                                          |                                                                          |                                                                          |                                                                          |                                                                          |                                                                          |                                                                          |  |
| Thomas 2016               |                                                      |                                                         |                                                                         |                                                                   |                                                                         |                                                                         |                                                                         |                                                                         |                                                                         |                                                                          |                                                                          |                                                                          |                                                                          |                                                                          |                                                                          |                                                                          |                                                                          |                                                                          |                                                                          |                                                                          |                                                                          |  |
| Tsang 2015                |                                                      |                                                         |                                                                         |                                                                   |                                                                         |                                                                         |                                                                         |                                                                         |                                                                         |                                                                          |                                                                          |                                                                          |                                                                          |                                                                          |                                                                          |                                                                          |                                                                          |                                                                          |                                                                          |                                                                          |                                                                          |  |
| Tsang 2016                |                                                      |                                                         |                                                                         |                                                                   |                                                                         |                                                                         |                                                                         |                                                                         |                                                                         |                                                                          |                                                                          |                                                                          |                                                                          |                                                                          |                                                                          |                                                                          |                                                                          |                                                                          |                                                                          |                                                                          |                                                                          |  |
| Tsui 2016                 |                                                      |                                                         |                                                                         |                                                                   |                                                                         |                                                                         |                                                                         |                                                                         |                                                                         |                                                                          |                                                                          |                                                                          |                                                                          |                                                                          |                                                                          |                                                                          |                                                                          |                                                                          |                                                                          |                                                                          |                                                                          |  |
| Tsui 2016                 |                                                      |                                                         |                                                                         |                                                                   |                                                                         |                                                                         |                                                                         |                                                                         |                                                                         |                                                                          |                                                                          |                                                                          |                                                                          |                                                                          |                                                                          |                                                                          |                                                                          |                                                                          |                                                                          |                                                                          |                                                                          |  |
| Tsui 2016                 |                                                      |                                                         |                                                                         |                                                                   |                                                                         |                                                                         |                                                                         |                                                                         |                                                                         |                                                                          |                                                                          |                                                                          |                                                                          |                                                                          |                                                                          |                                                                          |                                                                          |                                                                          |                                                                          |                                                                          |                                                                          |  |
| Urban 2013                |                                                      |                                                         |                                                                         |                                                                   |                                                                         |                                                                         |                                                                         |                                                                         |                                                                         |                                                                          |                                                                          |                                                                          |                                                                          |                                                                          |                                                                          |                                                                          |                                                                          |                                                                          |                                                                          |                                                                          |                                                                          |  |
| Urban 2015                |                                                      |                                                         |                                                                         |                                                                   |                                                                         |                                                                         |                                                                         |                                                                         |                                                                         |                                                                          |                                                                          |                                                                          |                                                                          |                                                                          |                                                                          |                                                                          |                                                                          |                                                                          |                                                                          |                                                                          |                                                                          |  |
| van de Vensting 2013      |                                                      |                                                         |                                                                         |                                                                   |                                                                         |                                                                         |                                                                         |                                                                         |                                                                         |                                                                          |                                                                          |                                                                          |                                                                          |                                                                          |                                                                          |                                                                          |                                                                          |                                                                          |                                                                          |                                                                          |                                                                          |  |
| van Rijn 2008             |                                                      |                                                         |                                                                         |                                                                   |                                                                         |                                                                         |                                                                         |                                                                         |                                                                         |                                                                          |                                                                          |                                                                          |                                                                          |                                                                          |                                                                          |                                                                          |                                                                          |                                                                          |                                                                          |                                                                          |                                                                          |  |
| Vermuelen 2004            |                                                      |                                                         |                                                                         |                                                                   |                                                                         |                                                                         |                                                                         |                                                                         |                                                                         |                                                                          |                                                                          |                                                                          |                                                                          |                                                                          |                                                                          |                                                                          |                                                                          |                                                                          |                                                                          |                                                                          |                                                                          |  |
| Verschuur 2004            |                                                      |                                                         |                                                                         |                                                                   |                                                                         |                                                                         |                                                                         |                                                                         |                                                                         |                                                                          |                                                                          |                                                                          |                                                                          |                                                                          |                                                                          |                                                                          |                                                                          |                                                                          |                                                                          |                                                                          |                                                                          |  |
| Vittorio 2010             |                                                      |                                                         |                                                                         |                                                                   |                                                                         |                                                                         |                                                                         |                                                                         |                                                                         |                                                                          |                                                                          |                                                                          |                                                                          |                                                                          |                                                                          |                                                                          |                                                                          |                                                                          |                                                                          |                                                                          |                                                                          |  |
| Vincent 2016              |                                                      |                                                         |                                                                         |                                                                   |                                                                         |                                                                         |                                                                         |                                                                         |                                                                         |                                                                          |                                                                          |                                                                          |                                                                          |                                                                          |                                                                          |                                                                          |                                                                          |                                                                          |                                                                          |                                                                          |                                                                          |  |
| Wang 2016a                |                                                      |                                                         |                                                                         |                                                                   |                                                                         |                                                                         |                                                                         |                                                                         |                                                                         |                                                                          |                                                                          |                                                                          |                                                                          |                                                                          |                                                                          |                                                                          |                                                                          |                                                                          |                                                                          |                                                                          |                                                                          |  |
| Wang 2016b                |                                                      |                                                         |                                                                         |                                                                   |                                                                         |                                                                         |                                                                         |                                                                         |                                                                         |                                                                          |                                                                          |                                                                          |                                                                          |                                                                          |                                                                          |                                                                          |                                                                          |                                                                          |                                                                          |                                                                          |                                                                          |  |
| Webster 2014              |                                                      |                                                         |                                                                         |                                                                   |                                                                         |                                                                         |                                                                         |                                                                         |                                                                         |                                                                          |                                                                          |                                                                          |                                                                          |                                                                          |                                                                          |                                                                          |                                                                          |                                                                          |                                                                          |                                                                          |                                                                          |  |
| Webster 2016a             |                                                      |                                                         |                                                                         |                                                                   |                                                                         |                                                                         |                                                                         |                                                                         |                                                                         |                                                                          |                                                                          |                                                                          |                                                                          |                                                                          |                                                                          |                                                                          |                                                                          |                                                                          |                                                                          |                                                                          |                                                                          |  |
| Webster 2016b             |                                                      |                                                         |                                                                         |                                                                   |                                                                         |                                                                         |                                                                         |                                                                         |                                                                         |                                                                          |                                                                          |                                                                          |                                                                          |                                                                          |                                                                          |                                                                          |                                                                          |                                                                          |                                                                          |                                                                          |                                                                          |  |
| Webster 2016c             |                                                      |                                                         |                                                                         |                                                                   |                                                                         |                                                                         |                                                                         |                                                                         |                                                                         |                                                                          |                                                                          |                                                                          |                                                                          |                                                                          |                                                                          |                                                                          |                                                                          |                                                                          |                                                                          |                                                                          |                                                                          |  |
| Webster 2017              |                                                      |                                                         |                                                                         |                                                                   |                                                                         |                                                                         |                                                                         |                                                                         |                                                                         |                                                                          |                                                                          |                                                                          |                                                                          |                                                                          |                                                                          |                                                                          |                                                                          |                                                                          |                                                                          |                                                                          |                                                                          |  |
| Webster 2018              |                                                      |                                                         |                                                                         |                                                                   |                                                                         |                                                                         |                                                                         |                                                                         |                                                                         |                                                                          |                                                                          |                                                                          |                                                                          |                                                                          |                                                                          |                                                                          |                                                                          |                                                                          |                                                                          |                                                                          |                                                                          |  |
| Wojcicka 2014             |                                                      |                                                         |                                                                         |                                                                   |                                                                         |                                                                         |                                                                         |                                                                         |                                                                         |                                                                          |                                                                          |                                                                          |                                                                          |                                                                          |                                                                          |                                                                          |                                                                          |                                                                          |                                                                          |                                                                          |                                                                          |  |
